# Supplementary material for: Urban plants with different seed dispersal modes have convergent response but divergent sensitivity to climate change and anthropogenic stressors
Source: Research Square preprint supplement (doi:10.21203/rs.3.rs-3865539/v1), 2024-02-27
Supplement: Supplementary file 1 [file 668904fe588e012f015bcbd7.xlsx]

## Sheet: sheet1
Group	Factors	Estimate	SE	xmin	xmax	z value	Pr(>|z|)	R2
Anemochory	Area	0.415423	0.0182923	0.39713	0.433715	22.6801	0	0.301174
Anemochory	LSI	0.0137618	0.0167193	-0.00295749	0.030481	0.822529	0.410776	0.00997702
Anemochory	BD	-0.00640455	0.0166622	-0.0230667	0.0102576	0.384067	0.700929	0.00464318
Anemochory	Sealed25	-0.00301756	0.0102922	-0.0133097	0.00727461	0.292912	0.769589	0.00218768
Anemochory	City size	-0.0941221	0.0274999	-0.121622	-0.0666222	3.41808	0.0006306	0.0682367
Anemochory	MAP	0.145966	0.0297644	0.116202	0.175731	4.89756	1e-06	0.105823
Anemochory	MAT	-0.0510492	0.0304742	-0.0815234	-0.0205751	1.67348	0.0942326	0.0370097
Autochory	Area	0.455649	0.0183451	0.437304	0.473994	24.8036	0	0.282661
Autochory	LSI	0.000568911	0.00578562	-0.00521671	0.00635453	0.0982051	0.921769	0.000352923
Autochory	BD	-0.0209763	0.0263046	-0.0472809	0.00532832	0.796856	0.425534	0.0130126
Autochory	Sealed25	-0.00290177	0.0108491	-0.0137509	0.00794732	0.267171	0.789338	0.00180011
Autochory	City size	-0.155015	0.0310869	-0.186102	-0.123928	4.98002	6e-07	0.0961633
Autochory	UR.city	-0.0995193	0.029736	-0.129255	-0.0697833	3.34213	0.0008314	0.0617367
Autochory	MAP	0.123834	0.0325194	0.0913143	0.156353	3.80272	0.0001431	0.0768201
Autochory	MAT	-0.0852986	0.0317132	-0.117012	-0.0535854	2.68597	0.007232	0.0529149
Hydrochory	Area	0.657121	0.0409786	0.616142	0.698099	16.0142	0	0.205146
Hydrochory	LSI	-0.0057725	0.0187982	-0.0245707	0.0130257	0.306812	0.758987	0.00180211
Hydrochory	BD	-0.151009	0.0526671	-0.203676	-0.0983421	2.86349	0.00419	0.0471434
Hydrochory	Sealed25	-0.00799545	0.0239154	-0.0319108	0.0159199	0.334049	0.738343	0.00249609
Hydrochory	City size	-0.0976821	0.0730947	-0.170777	-0.0245874	1.33532	0.18177	0.0304953
Hydrochory	UR.city	-0.127644	0.0584397	-0.186084	-0.0692046	2.18122	0.0291673	0.0398491
Hydrochory	MAP	0.276846	0.0639403	0.212906	0.340787	4.32393	1.53e-05	0.0864284
Hydrochory	MAT	-0.163959	0.0634234	-0.227382	-0.100535	2.58162	0.0098338	0.051186
Zoochory	Area	0.520166	0.0256402	0.494525	0.545806	20.2608	0	0.276091
Zoochory	LSI	0.0153518	0.0220389	-0.00668703	0.0373907	0.696104	0.486363	0.00814835
Zoochory	BD	-0.0410814	0.0389557	-0.0800371	-0.00212567	1.05374	0.292001	0.0218049
Zoochory	Sealed25	-0.00225312	0.0117086	-0.0139618	0.00945551	0.192219	0.847571	0.0011959
Zoochory	City size	-0.105314	0.0406536	-0.145967	-0.0646602	2.58728	0.0096738	0.0558979
Zoochory	UR.city	-0.0861952	0.0354154	-0.121611	-0.0507798	2.43051	0.0150774	0.0457502
Zoochory	MAP	0.158077	0.0379089	0.120168	0.195986	4.16428	3.12e-05	0.0839034
Zoochory	MAT	-0.00348525	0.0174602	-0.0209455	0.013975	0.199392	0.841956	0.00184988
